# Supplementary material for: Lower Reproductive Rate and Lamb Survival Contribute to Lower Lamb Marking Rate in Maiden Ewes Compared to Multiparous Ewes
Source: MDPI journal article supplement (doi:10.3390/ani12040513), 2022-02-18
Supplement: s1 [file s1]

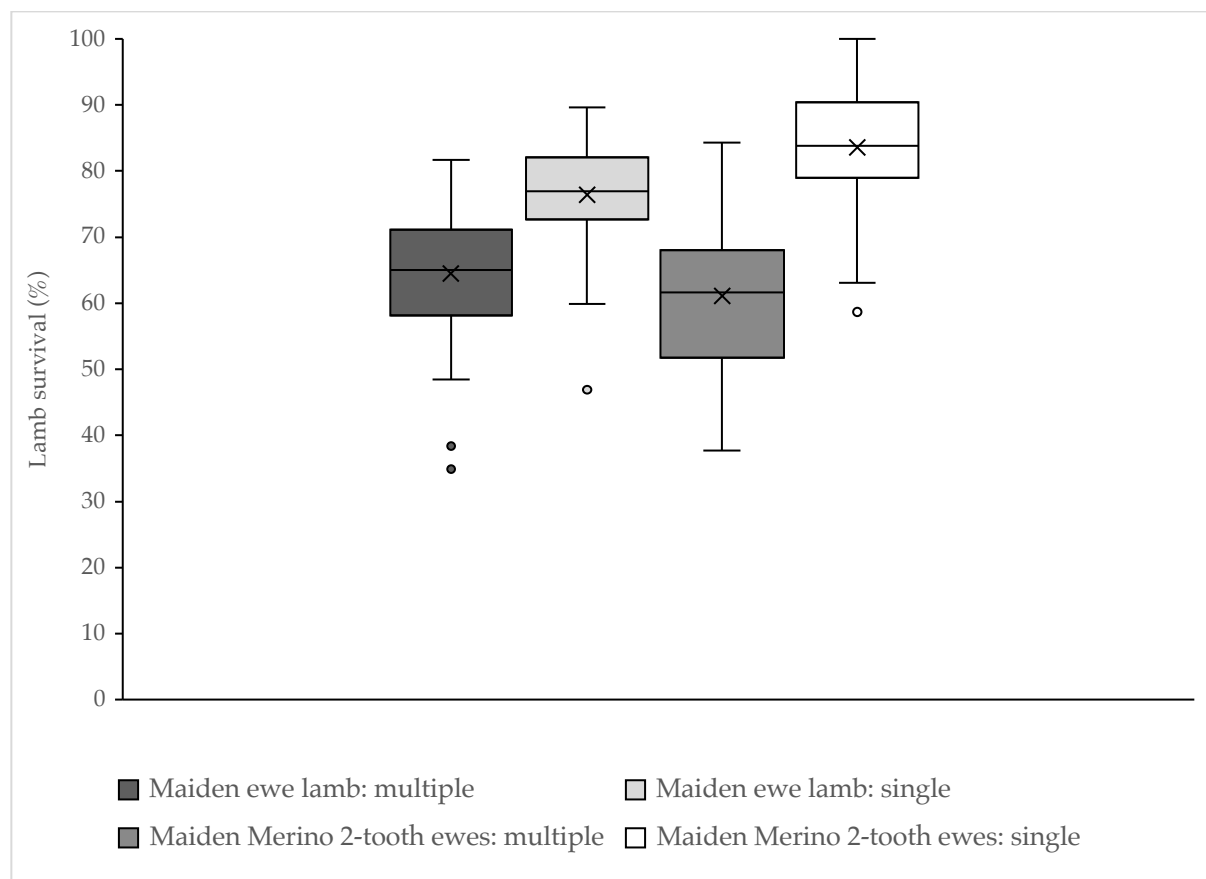

**Figure S1.** Box and whisker plot of for lamb survival in single- and multiple-born progeny of maiden ewe lambs and maiden Merino two-tooth ewes managed according to litter size
